# Supplementary material for: Estimating exposure of residential assets to natural hazards in Europe using open data
Source: Copernicus journal article supplement (doi:10.5194/nhess-2019-313), 2019-09-30
Supplement: Supplementary file 1 [file SI2.xlsx]

## Sheet: Contents
Supplementary Information 2
Time series of average replacement costs of residential buildings and household contents per m² of useful floor space, 2000-2017
Authors: D. Paprotny, H. Kreibich, O. Morales Napoles, P. Terefenko and K. Schröter
Table of contents
Table S1. Residential buildings, nominal prices, national currency
Table S2. Residential buildings, nominal prices, euro
Table S3. Residential buildings, real (2015) prices, euro
Table S4. Residential buildings, deflator, 2015 = 100
Table S5. Household contents, nominal prices, national currency
Table S6. Household contents, nominal prices, euro
Table S7. Household contents, real (2015) prices, euro
Table S8. Household contents, deflator, 2015 = 100
Notes:
First column is the country's NUTS level 0 code (ISO 3166 code for Greece is GR, for United Kingdom is GB).
In Tables S1 and S5 the currency code is provided in accordance to ISO 4217.

## Sheet: S1
Code	Country	Currency	2000	2001	2002	2003	2004	2005	2006	2007	2008	2009	2010	2011	2012	2013	2014	2015	2016	2017
AT	Austria	EUR	1016.92	1045.42	1072.82	1117.61	1127.41	1161.36	1209.32	1274.88	1334.96	1375.36	1414.86	1466.86	1516.91	1555.88	1592.76	1636.4	1675.29	1727.73
BE	Belgium	EUR	758.029	790.204	816.329	846.886	902.808	957.838	1023.38	1082.58	1176.08	1204.19	1237.37	1267.6	1317.39	1348.81	1366.92	1385.53	1404.67	1451.42
BG	Bulgaria	BGN	452.752	524.909	550.369	567.629	587.293	640.101	687.86	741.667	846.146	917.306	908.928	917.323	913.885	929.511	938.016	952.344	966.178	997.725
CY	Cyprus	EUR	343.008	363.577	382.059	398.107	433.147	494.683	539.249	581.207	647.971	642.738	648.673	607.641	597.414	736.378	743.015	748.102	756.271	757.033
CZ	Czechia	CZK	16867.8	17714.9	18302.7	18877.5	19762.6	20482.9	21688.2	24694.5	26884	25584.2	25021.3	25792.6	25159.7	24621.3	24973.6	25484.4	25872.6	26729.6
DK	Denmark	DKK	9309.42	9860.22	10063.9	10424.9	10595.8	11014	11989.1	12442.5	12770.4	11070.2	11692.4	12139.2	12517.7	12737.3	13074	13360.5	13700.1	14037.7
EE	Estonia	EUR	314.74	359.877	364.784	382.278	408.194	456.009	535.542	623.886	628.047	602.193	596.684	603.289	629.083	630.122	646.409	668.275	630.112	638.233
FI	Finland	EUR	1311.47	1374.68	1360.08	1377.46	1431.62	1524.82	1605.64	1734.56	1843.37	1802.49	1764.36	1850.19	1970.9	2019.35	2057.97	2100.97	2156.53	2241.64
FR	France	EUR	1052.92	1091.1	1127.84	1177.9	1234.68	1298.7	1369.64	1454.44	1506.38	1516.52	1560.56	1613.75	1638.7	1659.36	1676.61	1686.45	1714.69	1739.67
DE	Germany	EUR	1459.12	1475.57	1490.84	1507.24	1539.46	1566.84	1615.33	1727.27	1797.92	1835.98	1784.35	1855.03	1928.11	2001.67	2065.25	2119.87	2184.77	2270.08
EL	Greece	EUR	924.85	956.346	1008.52	1049.96	1095.73	1106.94	1193.71	1235.51	1275.38	1260.55	1229.08	1189.17	1153.86	1188.33	1101.66	1067.28	1050.27	1052.4
HU	Hungary	HUF	111793	123647	131418	139156	145889	152605	164942	176677	188275	195118	197739	203620	209972	215056	220443	227465	235662	252114
IS	Iceland	ISK	95168	101012	109403	113153	118109	125052	134966	147615	168727	195553	204062	216977	232708	242085	247082	257929	269568	275263
IE	Ireland	EUR	1305.76	1477.08	1662.25	1889.56	2111.73	2232.43	2445.06	2379	2016.85	1651.98	1552.21	1535.69	1578.94	1630.97	1728.32	1798.64	1886.31	1938.05
IT	Italy	EUR	922.037	948.145	984.614	1013.1	1057.54	1112.37	1150.17	1204.87	1256.48	1283.53	1314.75	1363.5	1395.52	1410.28	1416.31	1425.8	1435.46	1448.01
LV	Latvia	EUR	178.576	178.835	183.63	198.738	222.185	255.208	363.037	467.404	534.621	510.221	481.296	489.857	500.982	514.622	511.926	530.096	563.241	579.439
LT	Lithuania	EUR	280.828	291.807	306.764	324.641	352.867	389.7	447.464	509.784	499.373	461.855	433.595	446.814	469.408	495.075	497.9	512.286	528.686	548.043
LU	Luxembourg	EUR	1065.97	1109.57	1139.82	1160.32	1192.38	1223.72	1252.11	1312.04	1376.25	1334.02	1348.79	1371.96	1399.68	1441.19	1479.94	1499.45	1522.56	1528.93
MT	Malta	EUR	258.091	286.666	315.242	342.905	365.343	390.952	420.782	491.385	518.326	527.959	532.466	549.523	514.604	516.948	520.916	521.084	534.729	554.405
NL	Netherlands	EUR	943.747	1023.27	1101.73	1171.03	1224.89	1274.26	1342.24	1389.17	1447.56	1508.61	1535.81	1499.06	1457.97	1441.03	1403.18	1369.66	1370.72	1378.86
NO	Norway	NOK	7673.4	8234.37	8682.72	9135.47	9646.07	10165.6	10758.1	11738.1	12564.6	13038.5	13599.8	14364.4	15057.4	15809.9	16618.7	17326.7	18159.1	18948.2
PL	Poland	PLN	2321.47	2392.09	2388.04	2342.14	2406.79	2484.5	2535.18	2717.93	2905.7	2912.06	2913.07	2953.91	2967.61	2926.18	2907.52	2893.2	2887.38	2906.33
PT	Portugal	EUR	522.84	544.494	564.858	588.441	619.232	650.294	689.401	717.157	757.477	756.66	774.292	730.95	682.725	670.777	689.727	709.748	756.732	770.192
RO	Romania	RON	294.956	412.907	507.479	629.02	791.396	914.888	1019.96	1133.89	1337.82	1375.07	1422.57	1566.54	1689.94	1633.16	1644.2	1654.17	1691.56	1883.87
SK	Slovakia	EUR	245.24	261.368	285.204	318.317	354.497	394.15	422.82	497.398	572.038	602.628	613.401	617.717	616.428	630.481	639.887	654.558	673.928	693.28
SI	Slovenia	EUR	763.446	774.948	793.573	812.214	867.479	924.007	966.777	1022.61	1078.74	1093.55	1103.35	1142.3	1168.86	1193.54	1209.16	1208.4	1233.42	1288.78
ES	Spain	EUR	797.321	831.252	846.127	867.772	912.152	961.654	1034.58	1090.02	1146.13	1161.35	1190.42	1230.58	1230.97	1249.45	1265.01	1262.64	1260.75	1303.6
SE	Sweden	SEK	11009	11566.5	12052	12518	13099.6	13742.9	14586.2	15634.9	16494.7	16898.9	17459.1	18113.8	18656.2	19082.5	19376.1	19959.5	20417.6	21080.1
CH	Switzerland	CHF	1771.1	1835.92	1841.39	1828.98	1858.64	1920.27	1992.8	2090.1	2192.18	2212.37	2213.65	2249.78	2272.7	2290.9	2310.4	2308.67	2302.44	2322.02
UK	United Kingdom	GBP	567.397	608.468	663.997	725.884	782.056	859.709	908.455	987.425	1040.19	1001.52	1014.54	1064.99	1095.87	1154.22	1200.71	1220.02	1260.31	1285.59

## Sheet: S2
Code	Country	2000	2001	2002	2003	2004	2005	2006	2007	2008	2009	2010	2011	2012	2013	2014	2015	2016	2017
AT	Austria	1016.92	1045.42	1072.82	1117.61	1127.41	1161.36	1209.32	1274.88	1334.96	1375.36	1414.86	1466.86	1516.91	1555.88	1592.76	1636.4	1675.29	1727.73
BE	Belgium	758.029	790.204	816.329	846.886	902.808	957.838	1023.38	1082.58	1176.08	1204.19	1237.37	1267.6	1317.39	1348.81	1366.92	1385.53	1404.67	1451.42
BG	Bulgaria	231.919	269.433	282.356	291.241	300.667	327.283	351.702	379.214	432.634	469.018	464.735	469.027	467.269	475.259	479.608	486.933	494.006	510.136
CY	Cyprus	343.008	363.577	382.059	398.107	433.147	494.683	539.249	581.207	647.971	642.738	648.673	607.641	597.414	736.378	743.015	748.102	756.271	757.033
CZ	Czechia	473.828	519.985	594.167	592.775	619.693	687.762	765.231	889.38	1077.69	967.816	989.612	1048.9	1000.43	947.703	906.945	934.213	957.04	1015.33
DK	Denmark	1248.95	1323.15	1354.4	1402.96	1424.19	1478.03	1607.31	1670	1712.76	1486.69	1570.02	1629.29	1681.65	1707.89	1753.77	1791.26	1840.13	1887.14
EE	Estonia	314.74	359.877	364.784	382.278	408.194	456.009	535.542	623.886	628.047	602.193	596.684	603.289	629.083	630.122	646.409	668.275	630.112	638.233
FI	Finland	1311.47	1374.68	1360.08	1377.46	1431.62	1524.82	1605.64	1734.56	1843.37	1802.49	1764.36	1850.19	1970.9	2019.35	2057.97	2100.97	2156.53	2241.64
FR	France	1052.92	1091.1	1127.84	1177.9	1234.68	1298.7	1369.64	1454.44	1506.38	1516.52	1560.56	1613.75	1638.7	1659.36	1676.61	1686.45	1714.69	1739.67
DE	Germany	1459.12	1475.57	1490.84	1507.24	1539.46	1566.84	1615.33	1727.27	1797.92	1835.98	1784.35	1855.03	1928.11	2001.67	2065.25	2119.87	2184.77	2270.08
EL	Greece	924.85	956.346	1008.52	1049.96	1095.73	1106.94	1193.71	1235.51	1275.38	1260.55	1229.08	1189.17	1153.86	1188.33	1101.66	1067.28	1050.27	1052.4
HU	Hungary	429.907	481.886	540.904	548.678	579.708	615.217	624.164	702.912	748.58	696.028	717.8	728.853	725.919	724.41	714.079	733.758	756.685	815.403
IS	Iceland	1311.21	1155.48	1269.47	1305.87	1355.39	1598.52	1537.9	1684.53	1173.1	1132.52	1260.5	1344.18	1447.82	1490.85	1595.52	1763.02	2017.88	2283.59
IE	Ireland	1305.76	1477.08	1662.25	1889.56	2111.73	2232.43	2445.06	2379	2016.85	1651.98	1552.21	1535.69	1578.94	1630.97	1728.32	1798.64	1886.31	1938.05
IT	Italy	922.037	948.145	984.614	1013.1	1057.54	1112.37	1150.17	1204.87	1256.48	1283.53	1314.75	1363.5	1395.52	1410.28	1416.31	1425.8	1435.46	1448.01
LV	Latvia	178.576	178.835	183.63	198.738	222.185	255.208	363.037	467.404	534.621	510.221	481.296	489.857	500.982	514.622	511.926	530.096	563.241	578.589
LT	Lithuania	280.828	291.807	306.764	324.641	352.867	389.7	447.464	509.784	499.373	461.855	433.595	446.814	469.408	495.075	497.9	512.286	528.686	548.043
LU	Luxembourg	1065.97	1109.57	1139.82	1160.32	1192.38	1223.72	1252.11	1312.04	1376.25	1334.02	1348.79	1371.96	1399.68	1441.19	1479.94	1499.45	1522.56	1528.93
MT	Malta	258.091	286.666	315.242	342.905	365.343	390.952	420.782	491.385	518.326	527.959	532.466	549.523	514.604	516.948	520.916	521.084	534.729	554.405
NL	Netherlands	943.747	1023.27	1101.73	1171.03	1224.89	1274.26	1342.24	1389.17	1447.56	1508.61	1535.81	1499.06	1457.97	1441.03	1403.18	1369.66	1370.72	1378.86
NO	Norway	945.827	1023.11	1156.37	1141.46	1152.5	1269.24	1336.88	1464.24	1527.85	1493.91	1699.06	1843.15	2014.34	2025.17	1989.22	1936.03	1954.56	2031.54
PL	Poland	579.179	651.423	619.08	532.353	531.676	617.573	650.731	718.326	827.339	672.904	729.233	716.865	709.158	697.124	694.864	691.476	661.758	682.717
PT	Portugal	522.84	544.494	564.858	588.441	619.232	650.294	689.401	717.157	757.477	756.66	774.292	730.95	682.725	670.777	689.727	709.748	756.732	770.192
RO	Romania	148.056	158.786	162.289	167.511	195.358	252.669	289.286	339.967	363.281	324.317	337.726	369.546	378.969	369.576	370.007	372.108	376.706	412.333
SK	Slovakia	245.24	261.368	285.204	318.317	354.497	394.15	422.82	497.398	572.038	602.628	613.401	617.717	616.428	630.481	639.887	654.558	673.928	693.28
SI	Slovenia	763.446	774.948	793.573	812.214	867.479	924.007	966.777	1022.61	1078.74	1093.55	1103.35	1142.3	1168.86	1193.54	1209.16	1208.4	1233.42	1288.78
ES	Spain	1162.27	1180.75	1181.74	1187.1	1192.36	1200.57	1208.62	1212.48	1217.99	1221.19	1220.94	1215.99	1219.99	1234.64	1247.55	1262.64	1277.35	1293.26
SE	Sweden	1303.58	1249.75	1315.56	1371.95	1435.68	1480.57	1576.14	1690.24	1715.48	1591.37	1830.62	2006	2143.38	2205.69	2129.59	2133.91	2156.28	2187.85
CH	Switzerland	1136.85	1215.44	1255.21	1202.32	1203.94	1240.25	1266.96	1272.36	1380.99	1465.15	1603.74	1825.23	1885.59	1860.86	1902.19	2161.88	2111.95	2088.71
UK	United Kingdom	930.953	978.448	1055.92	1048.98	1152.35	1257.25	1332.57	1442.89	1306.31	1124.12	1182.67	1227.11	1351.47	1359.08	1489.49	1680.83	1537.94	1466.45

## Sheet: S3
Code	Country	2000	2001	2002	2003	2004	2005	2006	2007	2008	2009	2010	2011	2012	2013	2014	2015	2016	2017
AT	Austria	1467.73	1487.19	1506.03	1536.17	1510.7	1516.33	1525.3	1539.2	1556.72	1571.6	1580.49	1595.23	1609.01	1614.01	1620.6	1636.4	1642.67	1656.07
BE	Belgium	1159.96	1177.22	1190.88	1205.17	1221.04	1238.41	1256.98	1276.68	1294.96	1309.74	1324.9	1337.45	1349.1	1359.53	1372.72	1385.53	1397.45	1406.92
BG	Bulgaria	449.249	450.197	451.527	452.941	454.18	456.462	462.766	468.166	474.9	479.079	481.092	482.538	483.715	484.958	485.925	486.933	490.086	493.84
CY	Cyprus	575.459	585.893	594.084	597.338	614.856	638.593	663.066	679.527	698.658	710.081	715.616	715.119	727.724	731.963	739.3	748.102	750.269	750.269
CZ	Czechia	733.484	744.934	750.413	765.522	781.683	797.116	814.528	811.568	813.308	823.804	838.439	863.742	883.047	887.926	912.202	934.213	957.327	969.439
DK	Denmark	1972.37	1975.73	1951.68	1947.38	1929.93	1919.45	1899.5	1847.14	1807.12	1789.45	1850.84	1838.11	1815.27	1792.91	1793.62	1791.26	1777.64	1768.42
EE	Estonia	590.638	600.924	599.849	620.636	606.977	633.623	627.787	651.819	676.121	739.586	733.692	731.735	729.199	660.202	663.853	668.275	644.937	645.472
FI	Finland	1755.15	1766.77	1785.26	1806.18	1832.15	1854.83	1880.73	1906.28	1926.4	1944.12	1970.3	1996.75	2019.94	2042.04	2072.47	2100.97	2109.89	2140.94
FR	France	1921.66	1895.47	1874.19	1853.21	1814.59	1789.36	1747.55	1729.43	1692.99	1709.3	1711.69	1690.85	1682.15	1688.02	1680.97	1686.45	1686.41	1676.69
DE	Germany	1920.64	1945.44	1968.08	1989.93	2008.75	2027.06	2046.74	2067.27	2087.88	2107.35	2020.94	2043.46	2065.22	2083.85	2102.41	2119.87	2137.6	2155.41
EL	Greece	997.662	999.96	1008.38	1021.43	1038.46	1050.99	1068.12	1089.65	1098.68	1101.57	1099.76	1099.3	1073.09	1117.72	1071.56	1067.28	1067.73	1067.73
HU	Hungary	721.29	718.886	725.846	718.926	714.289	712.075	713.31	713.978	716.655	720.318	717.986	721.387	724.528	727.636	730.313	733.758	736.889	736.889
IS	Iceland	1679.38	1685.4	1696.32	1697.47	1701.82	1708.91	1710.07	1705.63	1703.76	1714.63	1719.23	1730.37	1741.02	1749.64	1757.76	1763.02	1769.34	1779.05
IE	Ireland	1561.98	1605.53	1651.4	1658.33	1673.67	1704.64	1735.67	1784.05	1814.23	1813.14	1794.61	1767.78	1774.58	1781.62	1789.74	1798.64	1811.72	1830.51
IT	Italy	1320.41	1332.42	1337.49	1343.57	1350.45	1358.91	1368.71	1378.67	1387.67	1393.13	1398.35	1401.21	1411.07	1421.77	1424.83	1425.8	1434.14	1445.91
LV	Latvia	405.855	415.894	422.138	430.168	441.72	453.3	472.09	496.709	522.601	540.488	551.312	546.715	542.776	535.506	528.849	530.096	532.868	535.031
LT	Lithuania	447.255	466.347	486.076	492.363	495.083	498.727	504.411	510.47	515.642	530.026	500.654	498.906	504.98	512.888	506.82	512.286	516.141	513.437
LU	Luxembourg	1528.29	1521.46	1521.64	1517.93	1516.05	1508.75	1503.61	1531.49	1555.36	1490.47	1493.75	1475.92	1465.72	1481.52	1496.54	1499.45	1506.84	1484.65
MT	Malta	371.889	388.436	407.289	432.961	458.973	485.052	515.033	544.169	560.959	562.257	581.93	591.521	541.688	535.698	526.709	521.084	523.218	533.595
NL	Netherlands	1184.93	1205.71	1224.3	1242.32	1260.63	1279.7	1300.19	1320.94	1338.31	1350.29	1360.14	1368.39	1358.33	1363.73	1364.78	1369.66	1381.66	1394.8
NO	Norway	1475.73	1510.81	1542.42	1575.26	1613.51	1646.19	1678.88	1705.56	1726.85	1751.06	1771.09	1803.4	1834.75	1871.35	1904.54	1936.03	1973.77	2008.74
PL	Poland	686.672	686.326	685.987	678.511	679.13	680.177	682.33	683.774	683.525	683.676	684.586	686.089	687.267	688.343	690.753	691.476	691.467	690.469
PT	Portugal	667.605	673.067	675.427	688.461	696.417	702.469	708.453	714.361	717.442	722.131	723.736	719.878	715.597	715.29	711.11	709.748	706.901	706.901
RO	Romania	322.092	322.514	324.313	326.788	328.461	331.41	333.008	336.505	341.594	345.614	350.888	354.524	359.314	363.025	367.295	372.108	377.5	389.861
SK	Slovakia	371.999	368.394	379.333	408.569	427.111	449.388	468.043	537.077	586.304	627.546	638.137	637.839	634.603	645.457	649.251	654.558	666.68	667.27
SI	Slovenia	1357.61	1296.09	1260.08	1221.04	1199.26	1203.87	1211.94	1221.84	1231.86	1237.66	1210.73	1214.03	1217.54	1221.61	1225.62	1208.4	1210.65	1233.31
ES	Spain	1162.27	1180.75	1181.74	1187.1	1192.36	1200.57	1208.62	1212.48	1217.99	1221.19	1220.94	1215.99	1219.99	1234.64	1247.55	1262.64	1277.35	1293.26
SE	Sweden	1923.19	1935.21	1946.38	1956.61	1969.77	1988.2	2009.59	2031.05	2043.42	2053.06	2067.1	2082.34	2090.74	2103.24	2120.3	2133.91	2135.89	2148.44
CH	Switzerland	1951.17	1962.54	1975.16	1993.81	2014.42	2036.44	2057.44	2077.71	2098.97	2116.14	2119.53	2110.95	2128.2	2140.96	2152.73	2161.88	2169.06	2187.51
UK	United Kingdom	1545.15	1563.5	1585.5	1607.83	1630.82	1648.49	1654.41	1694.39	1626.16	1557.97	1570.23	1591.83	1594.52	1618.28	1663.55	1680.83	1698.45	1701.99

## Sheet: S4
Code	Country	2000	2001	2002	2003	2004	2005	2006	2007	2008	2009	2010	2011	2012	2013	2014	2015	2016	2017
AT	Austria	69.2849	70.295	71.2352	72.7527	74.6286	76.5898	79.2842	82.8277	85.7542	87.5131	89.5204	91.9529	94.2761	96.3981	98.2822	100	101.986	104.327
BE	Belgium	65.3496	67.1244	68.5483	70.2711	73.9376	77.3442	81.4154	84.7964	90.8197	91.941	93.3935	94.7773	97.6499	99.2115	99.5775	100	100.517	103.162
BG	Bulgaria	51.6237	59.8478	62.5336	64.3	66.2	71.7	76	81	91.1	97.9	96.6	97.2	96.6	98	98.7	100	100.8	103.3
CY	Cyprus	59.606	62.0551	64.3107	66.6469	70.4469	77.4645	81.3267	85.5311	92.745	90.5161	90.6454	84.9707	82.0935	100.603	100.502	100	100.8	100.902
CZ	Czechia	84.3024	87.1749	89.4101	90.3979	92.68	94.1981	97.6086	111.544	121.174	113.846	109.398	109.467	104.447	101.65	100.36	100	99.0722	101.075
DK	Denmark	63.2806	66.9107	69.1342	71.7728	73.6088	76.9316	84.622	90.3116	94.7441	82.9415	84.6978	88.5433	92.4528	95.2481	97.7268	100	103.328	106.426
EE	Estonia	53.2882	59.8872	60.8127	61.5944	67.2503	71.9685	85.3063	95.7147	92.8897	81.4229	81.3263	82.4464	86.2704	95.4439	97.3723	100	97.7013	98.8784
FI	Finland	74.7212	77.8075	76.1837	76.2633	78.1389	82.2082	85.3734	90.9919	95.6899	92.7152	89.5482	92.6601	97.5722	98.8889	99.3001	100	102.21	104.703
FR	France	54.7923	57.5632	60.1777	63.5599	68.0415	72.579	78.3751	84.0992	88.9775	88.7216	91.1711	95.4406	97.4168	98.302	99.7406	100	101.677	103.756
DE	Germany	75.9705	75.8475	75.7509	75.7435	76.6378	77.2963	78.9221	83.5533	86.1122	87.1225	88.2933	90.7793	93.3609	96.0561	98.2324	100	102.207	105.32
EL	Greece	92.7017	95.6384	100.015	102.794	105.515	105.323	111.758	113.386	116.083	114.432	111.759	108.176	107.527	106.317	102.809	100	98.3645	98.5646
HU	Hungary	49.9969	55.4833	58.4048	62.4389	65.8852	69.1321	74.5916	79.8239	84.7465	87.3797	88.8414	91.052	93.4855	95.34	97.3702	100	103.163	110.366
IS	Iceland	38.7345	40.9662	44.0837	45.564	47.4379	50.0181	53.9469	59.1564	67.6909	77.9558	81.1304	85.7095	91.3617	94.5744	96.0808	100	104.139	105.759
IE	Ireland	83.5959	91.9996	100.657	113.944	126.174	130.962	140.871	133.348	111.168	91.1117	86.493	86.871	88.9753	91.5445	96.5684	100	104.117	105.875
IT	Italy	69.8294	71.1598	73.6164	75.4036	78.3098	81.8576	84.033	87.3937	90.5457	92.1328	94.0219	97.3083	98.8979	99.1921	99.4023	100	100.093	100.145
LV	Latvia	44	43	43.5	46.2	50.3	56.3	76.9	94.1	102.3	94.4	87.3	89.6	92.3	96.1	96.8	100	105.7	108.3
LT	Lithuania	62.7892	62.5729	63.1104	65.9354	71.2744	78.1388	88.7101	99.8657	96.845	87.1382	86.6056	89.5587	92.9556	96.527	98.2401	100	102.43	106.74
LU	Luxembourg	69.7489	72.9279	74.9078	76.4411	78.6503	81.1083	83.2733	85.6711	88.4843	89.5035	90.2955	92.956	95.4945	97.2777	98.8908	100	101.043	102.982
MT	Malta	69.4	73.8	77.4	79.2	79.6	80.6	81.7	90.3	92.4	93.9	91.5	92.9	95	96.5	98.9	100	102.2	103.9
NL	Netherlands	79.646	84.869	89.9889	94.2615	97.1645	99.5748	103.234	105.165	108.163	111.725	112.916	109.549	107.335	105.669	102.814	100	99.2084	98.8576
NO	Norway	58.1	60.9	62.9	64.8	66.8	69	71.6	76.9	81.3	83.2	85.8	89	91.7	94.4	97.5	100	102.8	105.4
PL	Poland	80.8	83.3	83.2	82.5	84.7	87.3	88.8	95	101.6	101.8	101.7	102.9	103.2	101.6	100.6	100	99.8	100.6
PT	Portugal	78.3159	80.8974	83.6298	85.4719	88.9169	92.5726	97.3107	100.391	105.58	104.782	106.985	101.538	95.4064	93.777	96.9929	100	107.049	108.953
RO	Romania	20.6	28.8	35.2	43.3	54.2	62.1	68.9	75.8	88.1	89.5	91.2	99.4	105.8	101.2	100.7	100	100.8	108.7
SK	Slovakia	65.9251	70.9481	75.1856	77.9101	82.9989	87.7081	90.3378	92.6119	97.5668	96.0293	96.1237	96.8453	97.1359	97.6798	98.5577	100	101.087	103.898
SI	Slovenia	56.2348	59.7912	62.9783	66.5184	72.3343	76.7532	79.7711	83.6942	87.5694	88.3556	91.1305	94.092	96.0011	97.7019	98.6567	100	101.881	104.498
ES	Spain	68.6	70.4	71.6	73.1	76.5	80.1	85.6	89.9	94.1	95.1	97.5	101.2	100.9	101.2	101.4	100	98.7	100.8
SE	Sweden	61.2	63.9	66.2	68.4	71.1	73.9	77.6	82.3	86.3	88	90.3	93	95.4	97	97.7	100	102.2	104.9
CH	Switzerland	85	87.6	87.3	85.9	86.4	88.3	90.7	94.2	97.8	97.9	97.8	99.8	100	100.2	100.5	100	99.4	99.4
UK	United Kingdom	50.5912	53.6165	57.6978	62.1992	66.0681	71.8496	75.6519	80.2881	88.1268	88.5647	89.0153	92.1736	94.6864	98.2637	99.4394	100	102.231	104.065

## Sheet: S5
Code	Country	Currency	2000	2001	2002	2003	2004	2005	2006	2007	2008	2009	2010	2011	2012	2013	2014	2015	2016	2017
AT	Austria	EUR	340.388	351.463	363.048	373.872	369.717	372.283	374.508	383.962	398.437	411.066	420.157	433.249	446.287	455.676	462.987	473.433	481.277	488.288
BE	Belgium	EUR	149.902	153.896	159.038	162.832	166.064	168.822	172.12	174.678	178.763	183.735	188.166	193.706	199.397	204.375	206.799	209.167	213.199	216.209
BG	Bulgaria	BGN	87.6423	86.8267	86.8382	83.0387	83.2012	87.3235	94.5936	103.896	117.469	119.378	128.323	118.885	125.197	127.788	131.716	139.902	149.414	165.021
CY	Cyprus	EUR	83.6245	86.4091	89.9134	93.3521	93.8325	97.7104	102.001	102.621	105.142	104.377	104.159	102.711	104.049	102.757	100.385	100.692	99.9518	98.717
CZ	Czechia	CZK	2963.29	3079.94	3072.52	3070.48	3150.75	3127.19	3165.74	3221.97	3297.43	3370.87	3464.07	3586.02	3655.06	3669.37	3767.88	3879.68	4030.34	4211.17
DK	Denmark	DKK	1638.13	1684.98	1724.17	1753.59	1770.23	1798.24	1863.86	1897.15	1974.64	2028.17	2064.43	2113.72	2151.57	2152.18	2159.16	2212.48	2229.99	2253.14
EE	Estonia	EUR	65.0419	68.348	72.3948	76.2625	81.3516	88.4972	97.1711	109.062	117.097	122.936	129.248	133.38	141.49	149.178	155.436	158.85	161.541	167.56
FI	Finland	EUR	222.806	227.99	232.127	235.47	239.815	243.617	250.429	259.743	271.194	281.838	295.844	310.066	321.189	333.973	340.816	347.669	351.812	356.341
FR	France	EUR	243.303	246.604	249.965	251.281	253.228	255.308	260.842	267.807	275.562	281.835	289.443	299.221	308.015	312.635	314.044	316.756	320.587	323.145
DE	Germany	EUR	334.925	341.746	349.127	351.954	355.175	357.243	358.937	364.308	372.485	380.862	365.136	371.556	379.622	386.134	388.082	393.424	402.543	408.872
EL	Greece	EUR	82.3469	84.4701	86.5878	88.4878	94.8895	99.6923	106.077	112.061	121.625	119.118	127.548	128.203	127.267	125.096	121.74	119.328	118.536	117.09
HU	Hungary	HUF	16378.8	17422.4	18501.5	19055.7	19938.7	20415.7	20650.5	21383	21945.2	22746.7	22982.4	23447.6	24335.9	24694.7	25070	25290.2	25525.1	25926.3
IS	Iceland	ISK	17851.1	19319.1	21423.3	20662.6	21110.1	21413.3	22601.1	23871.5	26951.1	34055.3	35307.5	36543.7	39929.2	41707.3	43540.2	42459.8	44175.2	41269.3
IE	Ireland	EUR	199.1	216.358	230.512	242.497	251.254	257.905	263.328	268.253	270.536	262.445	253.393	247.811	239.91	224.738	212.33	206.626	194.696	181.822
IT	Italy	EUR	307.28	315.161	321.794	326.021	329.837	332.72	340.531	347.414	353.841	357.376	365.679	373.518	379.92	378.112	371.155	369.158	370.438	368.802
LV	Latvia	EUR	36.7808	37.5228	37.3867	36.0662	37.4397	40.0005	46.041	54.2811	63.2421	68.1449	69.139	71.707	74.343	76.5091	83.8014	90.3276	91.3057	99.6579
LT	Lithuania	EUR	59.9508	63.7721	67.8933	65.2349	69.2146	72.7185	79.9417	87.3734	96.3179	103.926	101.214	106.714	113.613	121.796	125.977	135.98	145.329	154.646
LU	Luxembourg	EUR	331.543	339.074	347.099	350.991	355.005	358.449	363.724	372.567	380.867	370.171	376.759	381.928	387.565	390.079	391.07	396.1	399.679	395.671
MT	Malta	EUR	209.652	222.392	228.173	227.311	244.09	257.735	271.231	279.305	283.555	283.377	296.717	300.465	281.234	279.68	278.466	281.714	287.597	297.799
NL	Netherlands	EUR	204.207	218.947	230.811	235.524	236.502	239.22	243.752	248.996	254.125	254.996	259.765	262.731	265.319	270.828	270.201	269.877	271.21	271.82
NO	Norway	NOK	1872.45	1965.14	2041.62	2087.81	2168.65	2239.91	2331.59	2463.14	2578.23	2747.6	2812.31	2860.66	2932.83	3032.36	3200.76	3431.43	3634.93	3827.18
PL	Poland	PLN	347.315	352.928	317.917	316.716	329.589	335.414	335.666	345.327	358.121	368.851	370.213	387.057	403.262	406.458	414.058	423.82	435.968	463.532
PT	Portugal	EUR	113.609	117.937	126.734	130.247	139.316	147.39	155.504	160.113	163.964	163.126	165.835	167.189	166.404	167.24	163.713	164.588	164.465	161.359
RO	Romania	RON	141.414	172.763	203.369	233.8	270.274	290.274	314.937	352.406	389.55	420.342	438.258	384.791	412.866	427.633	443.131	469.586	496.98	524.022
SK	Slovakia	EUR	38.8748	39.4014	41.0835	43.6494	47.1206	50.5557	55.1349	66.6561	79.7525	87.0223	95.2522	102.727	110.097	118.386	123.57	130.506	139.398	146.02
SI	Slovenia	EUR	120.582	124.171	129.501	133.405	137.319	144.573	152.335	162.701	176.081	186.414	191.185	200.922	205.369	206.637	206.715	202.842	204.709	208.936
ES	Spain	EUR	189.139	196.953	198.75	200.321	201.767	204.28	211.066	213.784	216.992	215.502	218.544	220.85	223.098	224.487	218.432	216.684	215.665	214.381
SE	Sweden	SEK	1382.54	1450.84	1525.38	1563.29	1586.12	1609.29	1658.62	1722.09	1801.04	1914.11	1989.33	2043.19	2099.61	2132.84	2192.22	2280.75	2336.21	2402.1
CH	Switzerland	CHF	743.719	743.718	727.33	747.301	748.322	756.468	770.82	792.164	799.097	787.205	787.646	773.958	767.724	753.19	745.704	742.153	740.353	740.145
UK	United Kingdom	GBP	180.195	188.274	197.599	207.202	216.488	223.73	230.983	245.19	253.151	254.37	269.097	284.316	296.451	308.123	322.189	327.649	339.287	365.399

## Sheet: S6
Code	Country	2000	2001	2002	2003	2004	2005	2006	2007	2008	2009	2010	2011	2012	2013	2014	2015	2016	2017
AT	Austria	340.388	351.463	363.048	373.872	369.717	372.283	374.508	383.962	398.437	411.066	420.157	433.249	446.287	455.676	462.987	473.433	481.277	488.288
BE	Belgium	149.902	153.896	159.038	162.832	166.064	168.822	172.12	174.678	178.763	183.735	188.166	193.706	199.397	204.375	206.799	209.167	213.199	216.209
BG	Bulgaria	44.8941	44.5677	44.5507	42.6058	42.5952	44.6485	48.3657	53.1218	60.0617	61.0381	65.6113	60.7857	64.0134	65.3382	67.3464	71.5318	76.3953	84.3751
CY	Cyprus	83.6245	86.4091	89.9134	93.3521	93.8325	97.7104	102.001	102.621	105.142	104.377	104.159	102.711	104.049	102.757	100.385	100.692	99.9518	98.717
CZ	Czechia	83.2409	90.4058	99.7442	96.4165	98.7976	105.003	111.698	116.04	132.183	127.515	137.007	145.833	145.336	141.238	136.835	142.222	149.084	159.962
DK	Denmark	219.771	226.107	232.04	235.993	237.937	241.316	249.878	254.63	264.839	272.376	277.206	283.698	289.046	288.578	289.633	296.63	299.521	302.898
EE	Estonia	65.0419	68.348	72.3948	76.2625	81.3516	88.4972	97.1711	109.062	117.097	122.936	129.248	133.38	141.49	149.178	155.436	158.85	161.541	167.56
FI	Finland	222.806	227.99	232.127	235.47	239.815	243.617	250.429	259.743	271.194	281.838	295.844	310.066	321.189	333.973	340.816	347.669	351.812	356.341
FR	France	243.303	246.604	249.965	251.281	253.228	255.308	260.842	267.807	275.562	281.835	289.443	299.221	308.015	312.635	314.044	316.756	320.587	323.145
DE	Germany	334.925	341.746	349.127	351.954	355.175	357.243	358.937	364.308	372.485	380.862	365.136	371.556	379.622	386.134	388.082	393.424	402.543	408.872
EL	Greece	82.3469	84.4701	86.5878	88.4878	94.8895	99.6923	106.077	112.061	121.625	119.118	127.548	128.203	127.267	125.096	121.74	119.328	118.536	117.09
HU	Hungary	62.9858	67.8998	76.1503	75.1347	79.2286	82.3048	78.1445	85.0726	87.2539	81.1426	83.4269	83.9303	84.1346	83.1836	81.2088	81.5811	81.9583	83.8522
IS	Iceland	245.95	220.992	248.588	238.461	242.255	273.723	257.533	272.412	187.382	197.227	218.096	226.389	248.424	256.85	281.158	290.224	330.677	342.37
IE	Ireland	199.1	216.358	230.512	242.497	251.254	257.905	263.328	268.253	270.536	262.445	253.393	247.811	239.91	224.738	212.33	206.626	194.696	181.822
IT	Italy	307.28	315.161	321.794	326.021	329.837	332.72	340.531	347.414	353.841	357.376	365.679	373.518	379.92	378.112	371.155	369.158	370.438	368.802
LV	Latvia	36.7808	37.5228	37.3867	36.0662	37.4397	40.0005	46.041	54.2811	63.2421	68.1449	69.139	71.707	74.343	76.5091	83.8014	90.3276	91.3057	99.6579
LT	Lithuania	59.9508	63.7721	67.8933	65.2349	69.2146	72.7185	79.9417	87.3734	96.3179	103.926	101.214	106.714	113.613	121.796	125.977	135.98	145.329	154.646
LU	Luxembourg	331.543	339.074	347.099	350.991	355.005	358.449	363.724	372.567	380.867	370.171	376.759	381.928	387.565	390.079	391.07	396.1	399.679	395.671
MT	Malta	209.652	222.392	228.173	227.311	244.09	257.735	271.231	279.305	283.555	283.377	296.717	300.465	281.234	279.68	278.466	281.714	287.597	297.799
NL	Netherlands	204.207	218.947	230.811	235.524	236.502	239.22	243.752	248.996	254.125	254.996	259.765	262.731	265.319	270.828	270.201	269.877	271.21	271.82
NO	Norway	230.799	244.166	271.904	260.869	259.107	279.667	289.739	307.259	313.512	314.811	351.35	367.062	392.346	388.43	383.122	383.417	391.248	410.333
PL	Poland	86.6511	96.1108	82.4175	71.9876	72.8084	83.3741	86.1589	91.2671	101.968	85.2323	92.676	93.9321	96.3659	96.8333	98.9552	101.293	99.9193	108.887
PT	Portugal	113.609	117.937	126.734	130.247	139.316	147.39	155.504	160.113	163.964	163.126	165.835	167.189	166.404	167.24	163.713	164.588	164.465	161.359
RO	Romania	70.9836	66.437	65.0366	62.2619	66.7179	80.1663	89.3236	105.659	105.781	99.1397	104.045	90.7719	92.5853	96.7715	99.7211	105.634	110.676	114.696
SK	Slovakia	38.8748	39.4014	41.0835	43.6494	47.1206	50.5557	55.1349	66.6561	79.7525	87.0223	95.2522	102.727	110.097	118.386	123.57	130.506	139.398	146.02
SI	Slovenia	120.582	124.171	129.501	133.405	137.319	144.573	152.335	162.701	176.081	186.414	191.185	200.922	205.369	206.637	206.715	202.842	204.709	208.936
ES	Spain	189.139	196.953	198.75	200.321	201.767	204.28	211.066	213.784	216.992	215.502	218.544	220.85	223.098	224.487	218.432	216.684	215.665	214.381
SE	Sweden	163.708	156.762	166.506	171.334	173.835	173.374	179.225	186.17	187.312	180.251	208.584	226.272	241.22	246.528	240.943	243.839	246.725	249.307
CH	Switzerland	477.386	492.365	495.794	491.258	484.727	488.58	490.063	482.233	503.4	521.328	570.634	627.907	636.957	611.803	613.951	694.965	679.098	665.778
UK	United Kingdom	295.654	302.755	314.233	299.428	318.994	327.186	338.818	358.286	317.918	285.508	313.691	327.599	365.597	362.814	399.679	451.407	414.028	416.804

## Sheet: S7
Code	Country	2000	2001	2002	2003	2004	2005	2006	2007	2008	2009	2010	2011	2012	2013	2014	2015	2016	2017
AT	Austria	397.63	406.23	414.386	425.695	421.541	425.097	429.396	436.077	443.645	450.55	455.42	461.331	466.357	467.458	469.215	473.433	474.005	474.9
BE	Belgium	166.826	168.546	171.412	174.196	176.692	178.971	181.344	184.317	187.36	190.625	193.053	196.551	199.979	203.358	206.313	209.167	211.903	213.814
BG	Bulgaria	41.933	41.0731	40.1774	39.2701	39.011	39.2084	40.3316	42.7286	47.5727	52.3162	57.5784	55.1621	59.1376	64.0766	67.3347	71.5318	76.7065	81.6563
CY	Cyprus	66.4689	69.0425	70.684	72.3089	74.5081	76.8612	79.6347	82.7216	86.1964	87.893	89.5617	91.0256	93.869	95.7722	98.1403	100.692	102.29	103.163
CZ	Czechia	85.7987	87.6856	89.334	91.1703	93.4639	96.2779	99.9243	102.411	106.236	110.947	115.767	122.663	127.961	131.294	136.84	142.222	147.622	155.197
DK	Denmark	235.319	236.684	238.017	238.933	240.599	244.652	249.979	256.214	262.872	268.445	272.778	277.273	281.842	285.643	290.404	296.63	302.389	310.173
EE	Estonia	81.9176	84.0093	86.9812	90.7959	95.0204	99.844	105.732	114.602	123.088	128.194	132.495	133.981	140.524	148.1	154.08	158.85	163.25	169.058
FI	Finland	235.598	236.014	237.847	239.833	242.48	245.882	251.488	260.205	271.34	281.302	292.527	304.768	316.268	327.675	338.223	347.669	355.873	364.337
FR	France	261.072	261.264	261.896	262.705	264.165	266.425	269.195	274.372	279.858	285.254	291.04	297.165	302.65	307.658	312.251	316.756	321.552	326.177
DE	Germany	359.257	365.38	370.232	374.375	377.757	380.998	384.574	387.282	390.984	393.383	376.421	379.905	383.661	387.469	390.16	393.424	397.181	399.931
EL	Greece	85.7917	87.7686	89.6423	92.0343	95.2299	98.3244	102.099	105.745	109.803	113.746	116.582	117.959	118.292	119.049	119.44	119.328	119.352	119.751
HU	Hungary	56.1424	57.1287	58.0954	59.8354	62.2141	64.7374	67.6628	70.5048	73.0814	74.5652	75.2424	76.8757	78.3136	79.6167	80.7282	81.5811	82.5112	83.5395
IS	Iceland	224.886	228.372	230.684	233.816	238.315	247.139	255.669	263.129	266.31	268.591	271.38	277.293	281.893	284.682	287.519	290.224	292.678	297.301
IE	Ireland	117.531	123.816	130.423	137.391	144.03	150.656	157.496	166.324	175.257	180.899	185.504	187.161	191.652	195.937	200.524	206.626	211.408	217.052
IT	Italy	393.85	397.517	398.482	398.662	398.651	398.022	396.951	395.068	392.177	387.227	384.625	381.523	379.548	377.009	372.958	369.158	366.655	364.446
LV	Latvia	31.1446	31.3738	31.6899	32.4946	34.0721	36.2473	41.2146	46.9634	53.2577	58.0826	62.4809	67.0205	71.3979	75.5486	83.5189	90.3276	91.4991	98.9236
LT	Lithuania	71.8564	73.2245	74.7487	77.347	79.9895	83.5846	87.9638	93.2527	98.4894	104.38	102.362	107.532	115.19	123.417	127.869	135.98	144.085	152.388
LU	Luxembourg	410.923	414.933	420.294	423.76	426.851	428.083	426.091	427.464	427.493	407.603	408.028	401.657	396.576	396.583	396.226	396.1	394.969	386.029
MT	Malta	231.773	241.425	250.008	260.461	270.472	280.942	290.385	297.536	302.174	300.324	310.385	314.985	289.051	285.95	282.317	281.714	282.426	283.697
NL	Netherlands	217.608	223.384	228.459	232.81	236.639	239.976	243.379	247.563	251.388	253.903	257.3	260.383	261.829	265.694	268.191	269.877	271.115	272.595
NO	Norway	231.196	240.345	249.005	258.321	269.654	280.849	293.649	305.852	317.989	329.071	339.359	350.784	360.579	370.13	377.463	383.417	388.043	390.189
PL	Poland	81.8485	82.6303	73.6648	74.0089	75.3412	76.5754	78.2281	80.5279	82.9557	85.2692	85.8065	88.2994	91.355	93.8304	97.3554	101.293	105.71	110.465
PT	Portugal	118.029	122.32	126.856	131.363	135.521	139.473	142.697	147.359	151.178	154.201	157.719	159.193	161.377	163.53	163.362	164.588	166.304	167.488
RO	Romania	75.8991	72.5877	74.2653	76.5493	79.4199	82.7738	87.5076	93.7933	101.982	108.458	111.495	95.7959	98.5561	100.459	102.654	105.634	109.592	112.818
SK	Slovakia	47.0589	48.2037	49.9954	51.9868	54.8298	58.8423	62.3944	69.3239	77.5186	84.8793	94.3297	101.809	108.711	116.998	123.132	130.506	138.764	145.083
SI	Slovenia	133.819	137.169	141.135	144.899	149.235	154.15	159.202	165.347	171.972	178.508	182.319	189.122	194.445	198.736	203.083	202.842	205.695	211.763
ES	Spain	239.228	241.477	239.379	237.74	235.998	234.369	232.303	229.41	227.2	225.07	223.196	220.639	218.886	218.577	217.32	216.684	216.203	215.616
SE	Sweden	147.836	151.173	154.479	157.95	161.471	166	171.175	177.873	185.057	192.599	200.888	209.273	217.677	225.928	234.836	243.839	251.759	261.004
CH	Switzerland	638.91	643.891	648.087	652.997	658.034	663.593	668.411	670.61	671.505	674.566	677.876	674.296	685.561	687.987	691.807	694.965	696.629	699.722
UK	United Kingdom	266.627	279.521	293.31	307.865	321.696	334.432	346.264	366.343	375.475	370.493	382.703	396.59	405.783	420.169	439.286	451.407	467.953	484.865

## Sheet: S8
Code	Country	2000	2001	2002	2003	2004	2005	2006	2007	2008	2009	2010	2011	2012	2013	2014	2015	2016	2017
AT	Austria	85.6041	86.5182	87.6111	87.8263	87.706	87.5758	87.2173	88.0491	89.8099	91.2365	92.2571	93.913	95.6964	97.4796	98.6726	100	101.534	102.819
BE	Belgium	89.8551	91.3081	92.7812	93.4765	93.985	94.329	94.9137	94.7705	95.4112	96.3857	97.4688	98.5529	99.7088	100.5	100.236	100	100.612	101.12
BG	Bulgaria	107.061	108.508	110.885	108.494	109.188	113.875	119.92	124.324	126.252	116.671	113.951	110.195	108.245	101.969	100.017	100	99.5943	103.33
CY	Cyprus	125.81	125.153	127.205	129.102	125.936	127.126	128.086	124.055	121.98	118.755	116.298	112.838	110.845	107.293	102.287	100	97.7137	95.6906
CZ	Czechia	126.609	128.762	126.081	123.459	123.578	119.069	116.138	115.331	113.783	111.377	109.692	107.169	104.71	102.452	100.938	100	100.084	99.4694
DK	Denmark	93.3315	95.4469	97.1203	98.3989	98.6443	98.5452	99.9648	99.2741	100.712	101.294	101.468	102.206	102.35	101.017	99.6824	100	98.8722	97.3915
EE	Estonia	79.3992	81.3576	83.2303	83.9934	85.6149	88.6355	91.9034	95.1657	95.1326	95.8983	97.5495	99.551	100.687	100.728	100.88	100	98.9531	99.114
FI	Finland	94.5705	96.6005	97.5954	98.1808	98.9008	99.0788	99.579	99.8223	99.9462	100.191	101.134	101.738	101.556	101.922	100.767	100	98.8589	97.8053
FR	France	93.1939	94.389	95.4441	95.6513	95.8597	95.8273	96.8969	97.607	98.465	98.8014	99.4511	100.692	101.773	101.618	100.574	100	99.6998	99.0703
DE	Germany	93.2272	93.5318	94.2995	94.011	94.0221	93.7651	93.3336	94.068	95.2687	96.8172	97.0018	97.8025	98.9472	99.6555	99.4675	100	101.35	102.235
EL	Greece	95.9847	96.2418	96.5926	96.1466	99.6425	101.391	103.896	105.973	110.766	104.723	109.406	108.684	107.587	105.08	101.926	100	99.3159	97.7778
HU	Hungary	94.1088	98.3767	102.731	102.732	103.382	101.73	98.4505	97.8337	96.866	98.4058	98.5308	98.3892	100.242	100.055	100.177	100	99.7913	100.112
IS	Iceland	54.2571	57.823	63.4783	60.4042	60.5472	59.224	60.4238	62.0107	69.1744	86.6658	88.9293	90.0804	96.8194	100.14	103.509	100	103.168	94.8825
IE	Ireland	169.402	174.741	176.742	176.501	174.446	171.188	167.196	161.283	154.365	145.078	136.597	132.405	125.18	114.699	105.888	100	92.0951	83.7688
IT	Italy	78.0196	79.2824	80.7549	81.7787	82.7382	83.5932	85.7865	87.9377	90.2249	92.2911	95.074	97.902	100.098	100.292	99.5165	100	101.032	101.195
LV	Latvia	118.097	119.599	117.977	110.991	109.884	110.354	111.71	115.582	118.747	117.324	110.656	106.993	104.125	101.271	100.338	100	99.7886	100.742
LT	Lithuania	62.7892	62.5729	63.1104	65.9354	71.2744	78.1388	88.7101	99.8657	96.845	87.1382	86.6056	89.5587	92.9556	96.527	98.2401	100	102.43	106.74
LU	Luxembourg	80.6824	81.7178	82.5848	82.8278	83.1685	83.7335	85.3629	87.1576	89.0931	90.8167	92.3364	95.088	97.7277	98.3599	98.6988	100	101.193	102.498
MT	Malta	90.4557	92.1163	91.2661	87.2725	90.2461	91.7395	93.404	93.8725	93.8383	94.3573	95.5966	95.3903	97.2955	97.8074	98.6362	100	101.831	104.971
NL	Netherlands	93.8417	98.0138	101.029	101.166	99.9424	99.6848	100.153	100.579	101.089	100.43	100.958	100.901	101.333	101.932	100.75	100	100.035	99.7157
NO	Norway	90.495	91.3601	91.614	90.3083	89.8625	89.1156	88.7197	89.9859	90.5953	93.2954	92.5978	91.1221	90.8831	91.5426	94.7491	100	104.668	109.597
PL	Poland	101.417	102.081	103.146	102.279	104.553	104.686	102.552	102.49	103.177	103.385	103.117	104.765	105.5	103.531	101.648	100	98.5681	100.289
PT	Portugal	96.2556	96.4165	99.9037	99.151	102.8	105.676	108.975	108.655	108.458	105.788	105.146	105.023	103.116	102.268	100.215	100	98.8942	96.3405
RO	Romania	41.9125	53.5397	61.6012	68.7056	76.5534	78.8868	80.9594	84.5202	85.9271	87.1827	88.4223	90.3582	94.2354	95.7577	97.1053	100	102.011	104.486
SK	Slovakia	82.6088	81.7394	82.1744	83.9625	85.9398	85.9173	88.3652	96.1518	102.882	102.525	100.978	100.901	101.275	101.186	100.356	100	100.456	100.646
SI	Slovenia	90.108	90.5236	91.7571	92.0676	92.0157	93.7871	95.687	98.3995	102.39	104.429	104.863	106.24	105.618	103.975	101.789	100	99.5204	98.6649
ES	Spain	79.062	81.5616	83.0271	84.2607	85.4952	87.1616	90.8581	93.1887	95.5071	95.749	97.9157	100.096	101.924	102.704	100.511	100	99.7509	99.427
SE	Sweden	99.9826	102.606	105.569	105.815	105.019	103.646	103.594	103.507	104.05	106.252	105.872	104.381	103.122	100.928	99.8036	100	99.2095	98.394
CH	Switzerland	109.003	108.16	105.092	107.165	106.49	106.748	107.989	110.615	111.434	109.278	108.805	107.482	104.864	102.517	100.937	100	99.5191	99.0515
UK	United Kingdom	93.1104	92.7973	92.8149	92.724	92.7145	92.1669	91.9033	92.209	92.8877	94.5901	96.8737	98.7687	100.651	101.032	101.047	100	99.8906	103.826
