# Supplementary material for: Estimating exposure of residential assets to natural hazards in Europe using open data
Source: Copernicus journal article supplement (doi:10.5194/nhess-2019-313), 2019-09-30
Supplement: Supplementary file [file nhess-2019-313-AC1-supplement.pdf]

Table 1. Comparison of average results from a 10-fold cross-validation.

| Method        | N      | R <sup>2</sup> | MAE (m) | MBE (m) | SMAPE | RMSE (m) | Observed mean (m) |
|---------------|--------|----------------|---------|---------|-------|----------|-------------------|
| NPBN          | 23,736 | 0.35           | 3.25    | 0.09    | 0.17  | 4.72     | 9.60              |
| Random Forest | 23,736 | 0.30           | 3.11    | -1.40   | 0.18  | 5.26     | 9.60              |

Table 2. Validation statistics for the building height prediction model (mean value of the uncertainty distribution), depending on the degree of urbanization at municipal level. Validated for 2% of data points in cities and towns/suburbs, and for all data points in rural areas.

| Degree of urbanisation | N      | R <sup>2</sup> | MAE (m) | MBE (m) | SMAPE | RMSE (m) | Observed mean (m) |
|------------------------|--------|----------------|---------|---------|-------|----------|-------------------|
| Cities                 | 44,949 | 0.35           | 3.32    | 0.06    | 0.17  | 4.79     | 9.77              |
| Towns and suburbs      | 2685   | 0.15           | 2.15    | 0.63    | 0.14  | 2.85     | 7.13              |
| Rural areas            | 3191   | 0.24           | 2.09    | 0.34    | 0.16  | 3.44     | 6.44              |

Table 3. Validation statistics for the building height prediction model (mean value of the uncertainty distribution) for different cities. For all cities, the results are an average of results for a 10-fold cross-validation. For individual cities, the results are an out-of-sample validation (i.e. the model's sample excluded the city that was validated).

| Area                          | N      | R <sup>2</sup> | MAE [m] | MBE [m] | SMAPE | RMSE [m] | Obs. mean [m] |
|-------------------------------|--------|----------------|---------|---------|-------|----------|---------------|
| All cities (cross-validation) | 23,736 | 0.35           | 3.25    | 0.09    | 0.17  | 4.72     | 9.60          |
| Amsterdam                     | 24,506 | 0.31           | 2.50    | -0.17   | 0.15  | 3.43     | 8.69          |
| Athens                        | 18,177 | 0.25           | 4.38    | -1.70   | 0.16  | 5.52     | 14.20         |
| Berlin                        | 25,526 | 0.49           | 3.65    | -1.29   | 0.18  | 5.10     | 10.51         |
| Bratislava                    | 926    | 0.42           | 6.81    | -4.61   | 0.30  | 10.44    | 13.57         |
| Brussels                      | 19,845 | 0.12           | 3.77    | -1.00   | 0.17  | 5.00     | 11.50         |
| Bucharest                     | 1695   | 0.36           | 6.01    | 1.00    | 0.28  | 7.93     | 10.35         |
| Budapest                      | 1963   | 0.37           | 4.14    | -1.72   | 0.19  | 6.76     | 11.80         |
| Copenhagen                    | 10,747 | 0.24           | 2.55    | 2.00    | 0.17  | 3.32     | 6.42          |
| Dublin                        | 12,648 | 0.09           | 1.69    | 1.13    | 0.12  | 2.21     | 6.57          |
| Helsinki                      | 8053   | 0.34           | 2.62    | 1.01    | 0.17  | 3.68     | 7.11          |
| Lisbon                        | 3486   | 0.10           | 5.37    | -0.60   | 0.20  | 7.42     | 13.42         |
| Ljubljana                     | 1196   | 0.19           | 3.28    | 1.97    | 0.22  | 4.39     | 6.35          |
| London                        | 22,17  | 0.10           | 3.36    | 2.65    | 0.18  | 4.48     | 7.79          |
| Luxembourg                    | 582    | 0.19           | 2.26    | -0.11   | 0.12  | 3.18     | 9.60          |
| Madrid                        | 4909   | 0.13           | 6.19    | -1.43   | 0.20  | 8.72     | 16.22         |
| Nicosia                       | 283    | 0.05           | 3.23    | -0.70   | 0.18  | 4.60     | 9.23          |
| Oslo                          | 4750   | 0.45           | 2.76    | 1.68    | 0.18  | 3.52     | 6.79          |
| Paris                         | 23,441 | 0.23           | 3.03    | 0.99    | 0.16  | 4.60     | 8.98          |
| Prague                        | 6802   | 0.47           | 3.92    | -1.86   | 0.19  | 6.02     | 11.46         |
| Reykjavik                     | 2364   | 0.05           | 2.99    | 2.05    | 0.22  | 3.61     | 5.80          |
| Riga                          | 1423   | 0.29           | 4.31    | -1.57   | 0.21  | 6.53     | 11.10         |
| Rome                          | 5397   | 0.36           | 3.97    | -1.69   | 0.16  | 5.45     | 13.14         |
| Sofia                         | 4127   | 0.39           | 4.35    | -0.56   | 0.21  | 6.38     | 10.49         |

|           |      |      |      |       |      |      |       |
|-----------|------|------|------|-------|------|------|-------|
| Stockholm | 8748 | 0.25 | 2.23 | 0.62  | 0.16 | 3.48 | 6.82  |
| Tallinn   | 1386 | 0.39 | 3.48 | 0.58  | 0.21 | 5.18 | 8.13  |
| Valletta  | 123  | 0.13 | 4.32 | 0.24  | 0.18 | 6.49 | 11.66 |
| Vienna    | 8690 | 0.50 | 2.89 | -0.11 | 0.16 | 4.34 | 9.34  |
| Vilnius   | 757  | 0.42 | 2.79 | -0.91 | 0.17 | 4.82 | 8.86  |
| Warsaw    | 7662 | 0.24 | 3.05 | -0.14 | 0.17 | 5.22 | 9.10  |
| Zagreb    | 4979 | 0.17 | 2.58 | 0.31  | 0.16 | 4.07 | 8.05  |

Table 4. Validation statistics for the building height prediction model (mean value of the uncertainty distribution) for various sets of residential buildings.

| Dataset                                                 | N     | R <sup>2</sup> | MAE                 | MBE                  | SMAPE | RMSE                | Obs. mean          |
|---------------------------------------------------------|-------|----------------|---------------------|----------------------|-------|---------------------|--------------------|
| Number of floors in residential buildings, Polish coast | 62,58 | 0.33           | 0.65                | -0.06                | 0.16  | 1.02                | 2.01               |
| of which: houses with 1 flat                            | 54,41 | 0.13           | 0.58                | -0.10                | 0.16  | 0.85                | 1.80               |
| houses with 2 flats                                     | 1145  | 0.04           | 0.64                | -0.04                | 0.16  | 0.95                | 2.02               |
| houses with 3 or more flats                             | 7025  | 0.16           | 1.24                | 0.18                 | 0.16  | 1.86                | 3.66               |
| Floor space area, detached houses, Meuse flood 1993     | 3043  | 0.41           | 54.0 m <sup>2</sup> | -17.3 m <sup>2</sup> | 0.18  | 83.5 m <sup>2</sup> | 160 m <sup>2</sup> |
| Floor space area, all houses, German floods 2002-2014   | 2868  | 0.33           | 119 m <sup>2</sup>  | 32.9 m <sup>2</sup>  | 0.26  | 206 m <sup>2</sup>  | 214 m <sup>2</sup> |
| of which: detached houses                               | 1556  | 0.15           | 94.5 m <sup>2</sup> | 34.4 m <sup>2</sup>  | 0.26  | 138 m <sup>2</sup>  | 166 m <sup>2</sup> |
| semi-detached houses                                    | 662   | 0.20           | 100 m <sup>2</sup>  | 43.2 m <sup>2</sup>  | 0.25  | 147 m <sup>2</sup>  | 178 m <sup>2</sup> |
| multi-family houses                                     | 647   | 0.30           | 196 m <sup>2</sup>  | 19.3 m <sup>2</sup>  | 0.26  | 346 m <sup>2</sup>  | 366 m <sup>2</sup> |

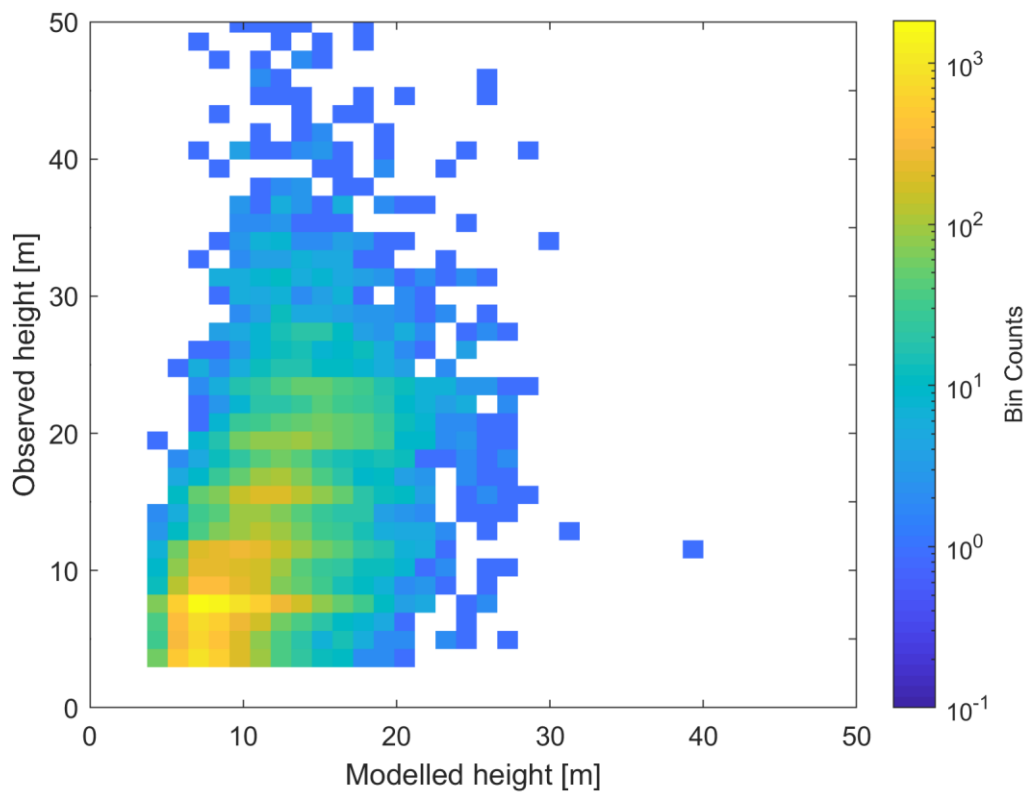

Figure 1. Binned scatter plot for observed and modelled heights of residential buildings for 30 European capitals, out-of-sample validation.

Table S3. Reference to methodologies used for obtaining building stock.

| Method                                               | Countries                                                                                                                                                                                        |
|------------------------------------------------------|--------------------------------------------------------------------------------------------------------------------------------------------------------------------------------------------------|
| Building stock taken directly from Eurostat database | Austria, Belgium, Cyprus, Czechia, Denmark, Estonia, Finland, France, Germany, Greece, Hungary, Ireland, Italy, Lithuania, Luxembourg, Netherlands, Portugal, Slovakia, Slovenia, United Kingdom |
| Eq. 3 (PIM)                                          | Iceland, Malta, Norway, Spain, Sweden and Switzerland                                                                                                                                            |
| Eq. 4 (modified PIM)                                 | Bulgaria, Latvia, Poland, Romania                                                                                                                                                                |
